# Supplementary material for: Pit and tracheid anatomy explain hydraulic safety but not hydraulic efficiency of 28 conifer species
Source: PubMed Central journal article supplement (PMC8793876; doi:10.1093/jxb/erab449), 2021-10-09
Supplement: erab449_suppl_supplementary_figures_s1-s4_tables_s1-s3.pdf [file erab449_suppl_supplementary_figures_s1-s4_tables_s1-s3.pdf]

## Supplementary data

Article title: **Pits and tracheids explain the hydraulic safety- but not the hydraulic efficiency of 28 conifer species**

The following Supplementary data is available for this article:

**Fig. S1** An example of a radial subsection (blue) from the cross-section for the measurements of *Tsuga heterophylla*. The tracheid diameter and wall thickness for earlywood (green) and latewood (black) were measured based on a radial subsection (blue).

**Fig. S2** Boxplot of P50 (the xylem pressure when 50% of hydraulic conductance is lost) and Ks (xylem specific hydraulic conductivity) across 28 conifer species (N=3-7 trees/species). Species with different letters are significantly different (Tukey HSD post hoc test,  $P < 0.05$ ). Error bars ( $\pm$  standard error of the mean value) are shown.

**Fig. S3** Principal components analysis (PCA) of multivariate trait associations across 28 conifer species. The first two PCA axes and the loadings of 14 traits are shown. Different trait groups are indicated with different colored arrows for pit traits (red), earlywood traits (blue), latewood traits (green), average wood traits of early and latewood (purple), and hydraulic traits (black). Different families (Cupressaceae, Pinaceae, Taxaceae) are indicated by different symbols. For trait abbreviations (in *Italics*), see Table 1, for species abbreviations (in grey) see Table S1.

**Fig. S4** Structural equation models for the effects of pit traits and tracheid traits of earlywood (a, c) and latewood (b, d) on the cavitation resistance ( $|P50|$ ) and hydraulic conductivity (Ks) for 28 conifer species: (a) earlywood and  $|P50|$  ( $\chi^2=23.38$ ,  $df=17$ ,  $P=0.053$ ), (b) latewood and ( $|P50|$ ) ( $\chi^2=20.34$ ,  $df=18$ ,  $P=0.31$ ), (c) earlywood and Ks ( $\chi^2=19.18$ ,  $df=7$ ,  $P=0.01$ ), (d) latewood and Ks ( $\chi^2=15.76$ ,  $df=7$ ,  $P=0.03$ ). The pit characteristics were all for earlywood, except pit aperture resistance could vary between early and latewood for P50; and tracheid diameter, density, and wall thickness for Ks. Significant coefficients are shown in bold, and ns means non-significance. The models for Ks cannot be accepted as in both cases  $P < 0.05$ .

**Table S1** Overview of species, abbreviations, family, subfamily and genera of 28 conifer species in the Netherlands.

**Table S2** Results of the structural equation models for the effects of pit and tracheid traits on cavitation resistance ( $|P50|$ ) (indicated in grey) and hydraulic conductivity (Ks) (indicated in green) shown in Fig. 6. Per relationship, standardized regression coefficients (beta), standard error (SE), Z-value, P-value and indirect effects are given. Bold fonts indicate significant regressions.

**Table S3** Results of a multi-model comparison showing how hydraulic conductivity (Ks) depends on the tracheid traits of earlywood (in blue) and latewood (in green). Only the best ( $\Delta AIC < 2$ ) and averaged models were included. Bold fonts indicate significant coefficients. Adjusted  $R^2$  ( $R^2_{adj}$ ) and  $P$  values are shown.

**Fig. S1** An example of a radial subsection (blue) from the cross-section for the measurements of *Tsuga heterophylla*. The tracheid diameter and wall thickness for earlywood (green) and latewood (black) were measured in this study.

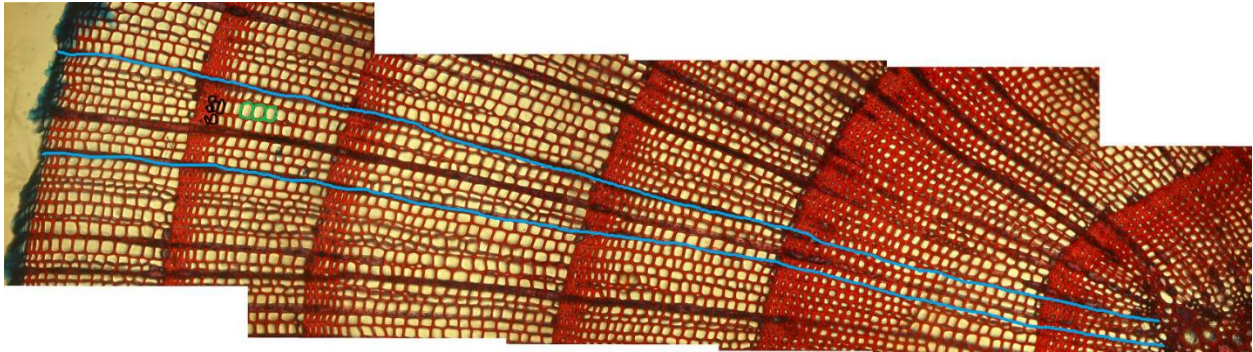

**Fig. S2** Barplot of P50 (the xylem pressure when 50% of hydraulic conductance is lost) in and Ks (xylem specific hydraulic conductivity) across 28 conifer species (N=3-7 trees/species). Species with different letters are significantly different (Tukey HSD post hoc test,  $P < 0.05$ ). Error bars ( $\pm$  standard error of the mean value) are shown.

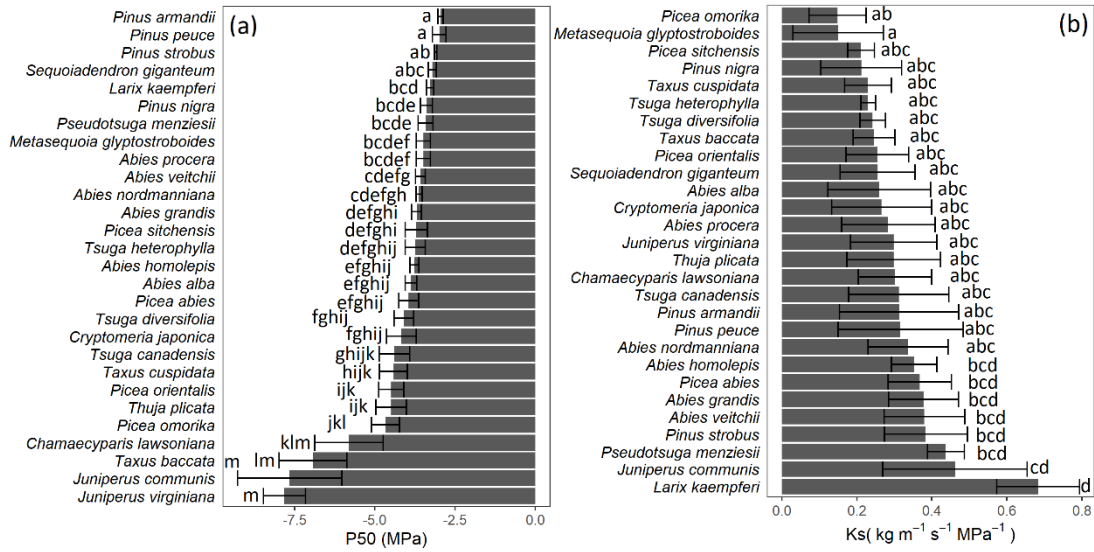

**Fig. S3** Principal components analysis (PCA) of multivariate trait associations across 28 conifer species. The first two PCA axes and the loadings of 14 traits are shown. Different trait groups are indicated with different colored arrows for pit traits (red), earlywood traits (blue), latewood traits (green), averaged wood traits of early and latewood (purple), and hydraulic traits (black). Different families (Cupressaceae, Pinaceae, Taxaceae) are indicated by different symbols. For trait abbreviations (in *Italics*), see Table 1, for species abbreviations (in grey) see Table S1.

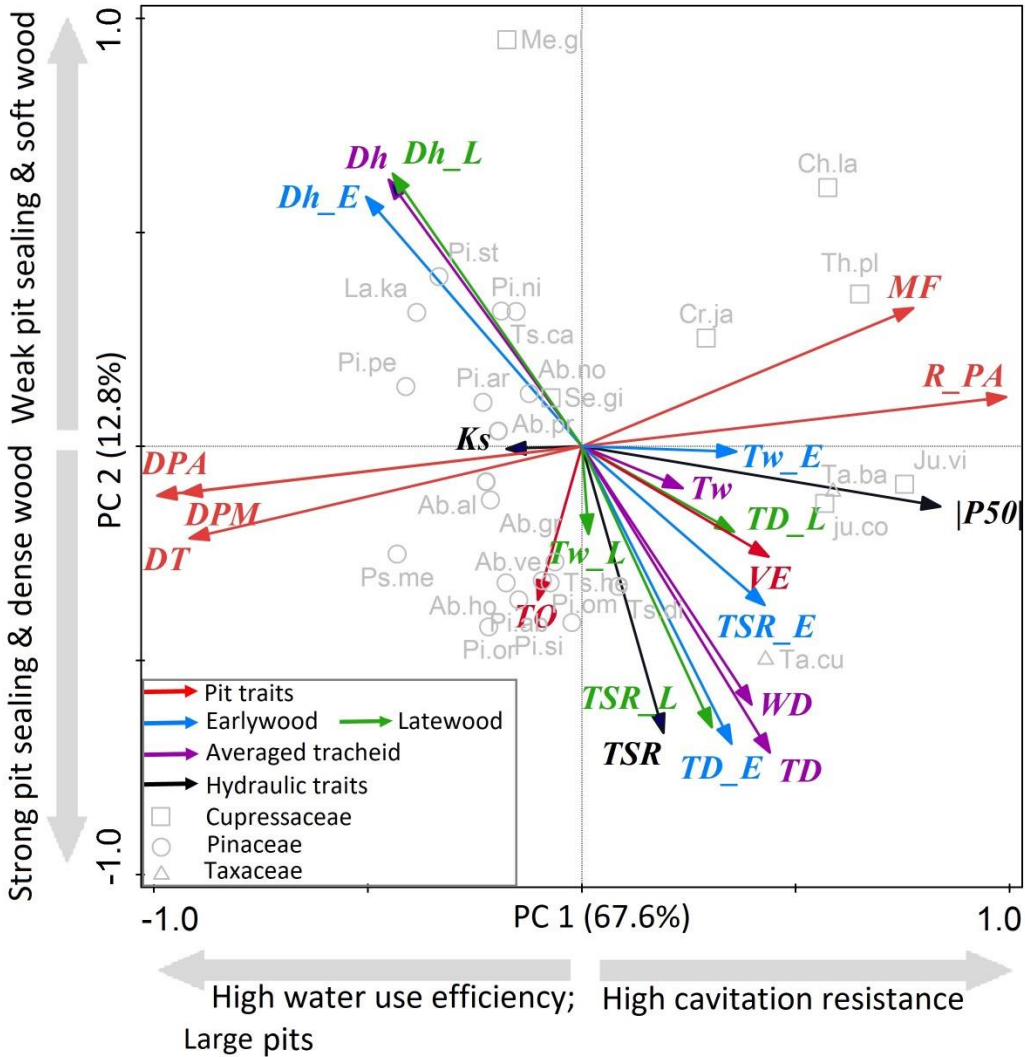

**Fig. S4** Structural equation models for the effects of pit traits and tracheid traits of earlywood (a, c) and latewood (b, d) on the cavitation resistance ( $|P50|$ ) and hydraulic conductivity ( $K_s$ ) for 28 conifer species: (a) earlywood and  $|P50|$  ( $\chi^2=23.38$ ,  $df=17$ ,  $P=0.053$ ), (b) latewood and ( $|P50|$ ) ( $\chi^2=20.34$ ,  $df=18$ ,  $P=0.31$ ), (c) earlywood and  $K_s$  ( $\chi^2=19.18$ ,  $df=7$ ,  $P=0.01$ ), (d) latewood and  $K_s$  ( $\chi^2=15.76$ ,  $df=7$ ,  $P=0.03$ ). The pit characteristics were all for earlywood, except pit aperture resistance could vary between early and latewood for P50; and tracheid diameter, density, and wall thickness for  $K_s$ . Significant coefficients are shown in bold, and ns means non-significance. The models for  $K_s$  cannot be accepted as in both cases  $P<0.05$ .

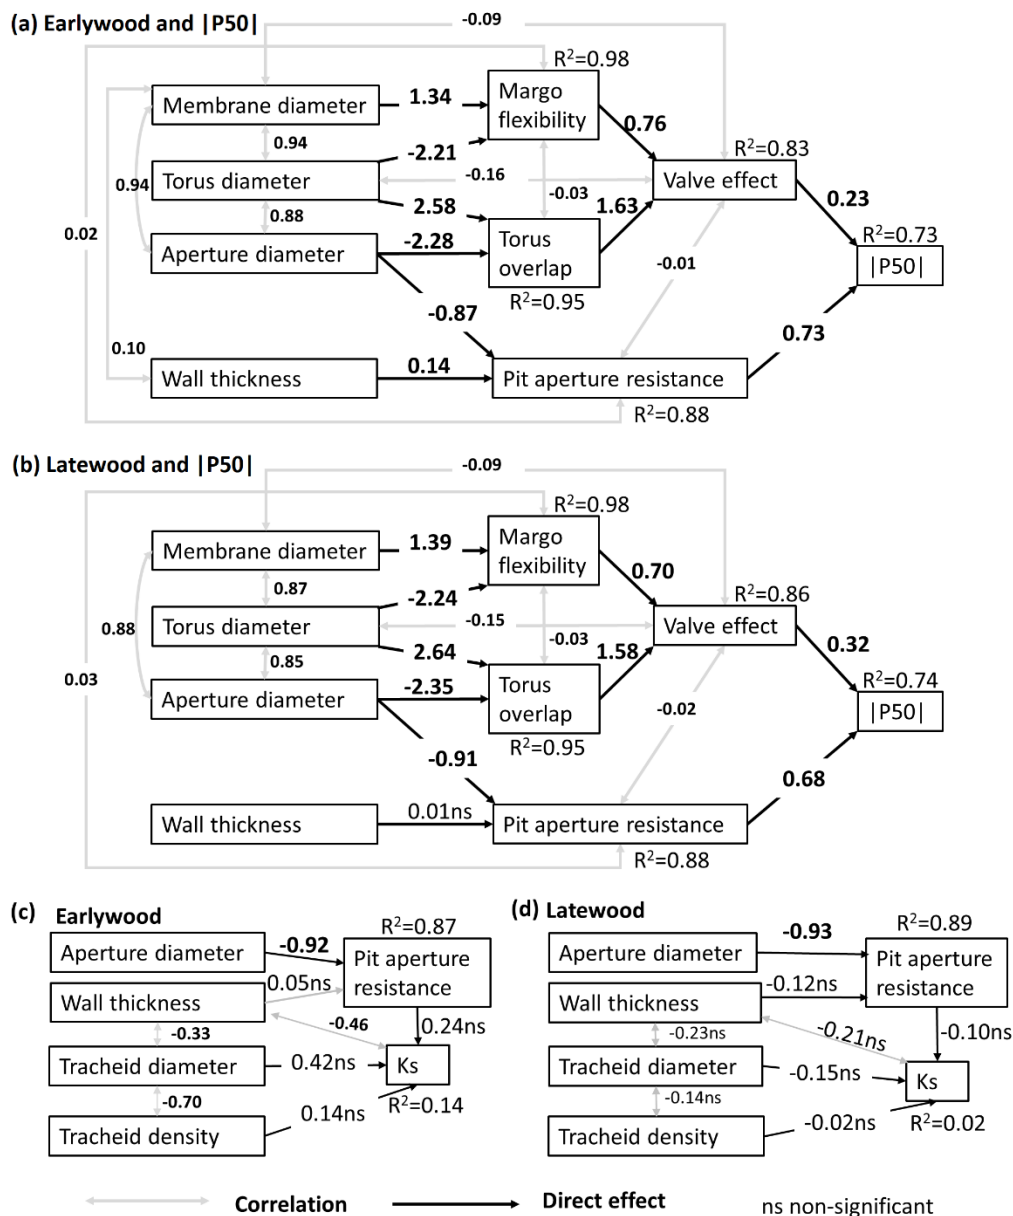

**Table S1** Overview of species, abbreviations, family, subfamily and genera of 28 conifer species in the Netherlands.

| Species                             | Abbreviation | Family       | Subfamily     | Genera                |
|-------------------------------------|--------------|--------------|---------------|-----------------------|
| <i>Abies alba</i>                   | Ab.al        | Pinaceae     | Abietoideae   | <i>Abies</i>          |
| <i>Abies grandis</i>                | Ab.gr        | Pinaceae     | Abietoideae   | <i>Abies</i>          |
| <i>Abies homolepis</i>              | Ab.ho        | Pinaceae     | Abietoideae   | <i>Abies</i>          |
| <i>Abies nordmanniana</i>           | Ab.no        | Pinaceae     | Abietoideae   | <i>Abies</i>          |
| <i>Abies procera</i>                | Ab.pr        | Pinaceae     | Abietoideae   | <i>Abies</i>          |
| <i>Abies veitchii</i>               | Ab.ve        | Pinaceae     | Abietoideae   | <i>Abies</i>          |
| <i>Chamaecyparis lawsoniana</i>     | Ch.la        | Cupressaceae | Cupressoideae | <i>Chamaecyparis</i>  |
| <i>Cryptomeria japonica</i>         | Cr.ja        | Cupressaceae | Taxodioideae  | <i>Cryptomeria</i>    |
| <i>Larix kaempferi</i>              | La.ka        | Pinaceae     | Laricoideae   | <i>Larix</i>          |
| <i>Metasequoia glyptostroboides</i> | Me.gl        | Cupressaceae | Sequoioideae  | <i>Metasequoia</i>    |
| <i>Juniperus communis</i>           | Ju.co        | Cupressaceae | Cupressoideae | <i>Juniperus</i>      |
| <i>Juniperus virginiana</i>         | Ju.vi        | Cupressaceae | Cupressoideae | <i>Juniperus</i>      |
| <i>Picea abies</i>                  | Pi.ab        | Pinaceae     | Piceoideae    | <i>Picea</i>          |
| <i>Picea orientalis</i>             | Pi.or        | Pinaceae     | Piceoideae    | <i>Picea</i>          |
| <i>Picea omorika</i>                | Pi.om        | Pinaceae     | Piceoideae    | <i>Picea</i>          |
| <i>Picea sitchensis</i>             | Pi.si        | Pinaceae     | Piceoideae    | <i>Picea</i>          |
| <i>Pinus armandii</i>               | Pi.ar        | Pinaceae     | Pinoideae     | <i>Pinus</i>          |
| <i>Pinus nigra</i>                  | Pi.ni        | Pinaceae     | Pinoideae     | <i>Pinus</i>          |
| <i>Pinus peuce</i>                  | Pi.pe        | Pinaceae     | Pinoideae     | <i>Pinus</i>          |
| <i>Pinus strobus</i>                | Pi.st        | Pinaceae     | Pinoideae     | <i>Pinus</i>          |
| <i>Pseudotsuga menziesii</i>        | Ps.me        | Pinaceae     | Laricoideae   | <i>Pseudotsuga</i>    |
| <i>Sequoiadendron giganteum</i>     | Se.gi        | Cupressaceae | Sequoioideae  | <i>Sequoiadendron</i> |
| <i>Taxus baccata</i>                | Ta.ba        | Taxaceae     | -             | <i>Taxus</i>          |
| <i>Taxus cuspidata</i>              | Ta.cu        | Taxaceae     | -             | <i>Taxus</i>          |
| <i>Thuja plicata</i>                | Th.pl        | Cupressaceae | Cupressoideae | <i>Thuja</i>          |
| <i>Tsuga canadensis</i>             | Ts.ca        | Pinaceae     | Abietoideae   | <i>Tsuga</i>          |
| <i>Tsuga diversifolia</i>           | Ts.di        | Pinaceae     | Abietoideae   | <i>Tsuga</i>          |
| <i>Tsuga heterophylla</i>           | Ts.he        | Pinaceae     | Abietoideae   | <i>Tsuga</i>          |

**Table S2** Results of the structural equation models for the effects of pit and tracheid traits on cavitation resistance ( $|P50|$ ) (indicated in grey) and hydraulic conductivity (Ks) (indicated in green) shown in Fig. 6. Per relationship, standardized regression coefficients (beta), standard error (SE), Z-value, *P*-value and indirect effects are given. Bold fonts indicate significant regressions.

| Response variable                                                      | Predictor variable                   | beta         | SE   | Z      | <i>P</i> |
|------------------------------------------------------------------------|--------------------------------------|--------------|------|--------|----------|
| <b>Direct effects</b>                                                  |                                      |              |      |        |          |
| $ P50 $                                                                | Valve effect (VE)                    | <b>0.30</b>  | 0.10 | 3.01   | 0.003    |
|                                                                        | Pit aperture resistance ( $R_{PA}$ ) | <b>0.69</b>  | 0.11 | 5.99   | <0.001   |
| Valve effect                                                           | Torus overlap (TO)                   | <b>1.58</b>  | 0.07 | 22.29  | <0.001   |
|                                                                        | Margo flexibility (MF)               | <b>0.70</b>  | 0.09 | 7.72   | <0.001   |
| Torus overlap                                                          | Aperture diameter                    | <b>-2.34</b> | 0.07 | -33.20 | <0.001   |
|                                                                        | Torus diameter                       | <b>2.64</b>  | 0.08 | 31.75  | <0.001   |
| Margo flexibility                                                      | Membrane diameter                    | <b>1.38</b>  | 0.05 | 28.95  | <0.001   |
|                                                                        | Torus diameter                       | <b>-2.24</b> | 0.05 | -42.14 | <0.001   |
| Pit aperture resistance                                                | Aperture diameter                    | <b>-0.93</b> | 0.05 | -17.45 | <0.001   |
|                                                                        | Wall thickness                       | 0.02         | 0.02 | 0.71   | 0.48     |
| <b>Indirect effects</b>                                                |                                      |              |      |        |          |
| Indirect effects from torus overlap via VE to $ P50 $                  |                                      |              |      |        |          |
| $ P50 $                                                                | Torus overlap                        | <b>0.48</b>  | 0.16 | 2.98   | 0.003    |
| Indirect effects from Margo flexibility via VE to $ P50 $              |                                      |              |      |        |          |
| $ P50 $                                                                | Margo flexibility                    | <b>0.21</b>  | 0.08 | 2.81   | 0.005    |
| Indirect effects from aperture diameter via TO and $R_{PA}$ to $ P50 $ |                                      |              |      |        |          |
| $ P50 $                                                                | Aperture diameter                    | <b>-1.75</b> | 0.34 | -5.12  | <0.001   |
| Indirect effects from wall thickness via $R_{PA}$ to $ P50 $           |                                      |              |      |        |          |
| $ P50 $                                                                | Wall thickness                       | 0.01         | 0.02 | 0.70   | 0.48     |
| <b>Direct effects</b>                                                  |                                      |              |      |        |          |
| Ks                                                                     | Hydraulic diameter                   | 0.04         | 0.27 | 0.13   | 0.89     |
|                                                                        | Tracheid density                     | -0.13        | 0.25 | -0.53  | 0.59     |
|                                                                        | Pit aperture resistance ( $R_{PA}$ ) | 0.08         | 0.16 | 0.47   | 0.64     |
| Pit aperture resistance                                                | Aperture diameter                    | <b>-0.97</b> | 0.06 | -17.47 | <0.001   |
|                                                                        | Wall thickness                       | -0.08        | 0.06 | -1.44  | 0.15     |
| <b>Indirect effects</b>                                                |                                      |              |      |        |          |
| Indirect effects from aperture diameter via $R_{PA}$ to Ks             |                                      |              |      |        |          |
| Ks                                                                     | Aperture diameter                    | -0.07        | 0.16 | -0.47  | 0.64     |
| Indirect effects from wall thickness via $R_{PA}$ to Ks                |                                      |              |      |        |          |
| Ks                                                                     | Wall thickness                       | -0.01        | 0.01 | -0.44  | 0.66     |



**Table S3** Results of a multi-model comparison showing how hydraulic conductivity ( $K_s$ ) depends on the tracheid traits of earlywood (in blue) and latewood (in green). Only the best ( $\Delta AIC < 2$ ) and averaged models were included. Bold fonts indicate significant coefficients. Adjusted  $R^2$  ( $R^2_{adj}$ ) and  $P$  values are shown.

| model                              | Dh   | TD | $R_{PA}$ | Intercept               | df | logLik | AICc  | Weight | $R^2_{adj}$ | $P$  |
|------------------------------------|------|----|----------|-------------------------|----|--------|-------|--------|-------------|------|
| Earlywood: $K_s = D + TD + R_{PA}$ |      |    |          |                         |    |        |       |        |             |      |
| 1                                  |      |    |          | $-1.05 \times 10^{-16}$ | 2  | -39.22 | 82.90 | 0.42   | 0           | 1    |
| 2                                  | 0.20 |    |          | $1.80 \times 10^{-17}$  | 3  | -38.64 | 84.30 | 0.21   | <0.01       | 0.30 |
| Avg                                | 0.07 |    |          |                         |    |        |       |        |             |      |
| Imp                                | 0.34 |    |          |                         |    |        |       |        |             |      |
| $P$                                | 0.65 |    |          |                         |    |        |       |        |             |      |
| Latewood: $K_s = D + TD + R_{PA}$  |      |    |          |                         |    |        |       |        |             |      |
| 1                                  |      |    |          | $-1.05 \times 10^{-16}$ | 2  | -39.22 | 82.90 | 0.48   |             |      |

Notes: Values indicate regression coefficients of the selected variables in the model. Per model, degrees of freedom (df), the log likelihood (logLik), corrected Akaike information criterion (AICc), and the AICc weight are given. Models are selected based on  $\Delta AIC < 2$ . The average model was calculated based on the selected models. The average coefficients (Avg), relative importance (Imp), and significances ( $P$ ) are shown. Relative importance of the predictor variables is calculated as the sum of the Akaike weights over the best selected models. D, tracheid diameter; TD, tracheid density;  $R_{PA}$ , pit aperture resistance.
